# Supplementary material for: Two New Cembrane-Based Diterpenoids from the Marine Soft Coral Sinularia crassa
Source: Molecules. 2012 May 8;17(5):5422–9. doi: 10.3390/molecules17055422 (PMC6268420; doi:10.3390/molecules17055422)
Supplement: Supplementary file 1 [file molecules-17-05422-s001.pdf]

# Supporting Information

## Two New Cembrane-Based Diterpenoids from the Marine Soft Coral *Sinularia crassa*

Yun-Sheng Lin, Nai-Lun Lee, Mei-Chin Lu<sup>\*</sup> and Jui-Hsin Su<sup>\*</sup>

### Table of Contents

**S1.** Table of Contents

**S2.** <sup>1</sup>H NMR spectrum of **1** in CDCl<sub>3</sub> at 500 MHz.

**S3.** <sup>13</sup>C NMR spectrum of **1** in CDCl<sub>3</sub> at 125 MHz.

**S4.** <sup>1</sup>H NMR spectrum of **2** in CDCl<sub>3</sub> at 500 MHz.

**S5.** <sup>13</sup>C NMR spectrum of **2** in CDCl<sub>3</sub> at 125 MHz.

**S1.**

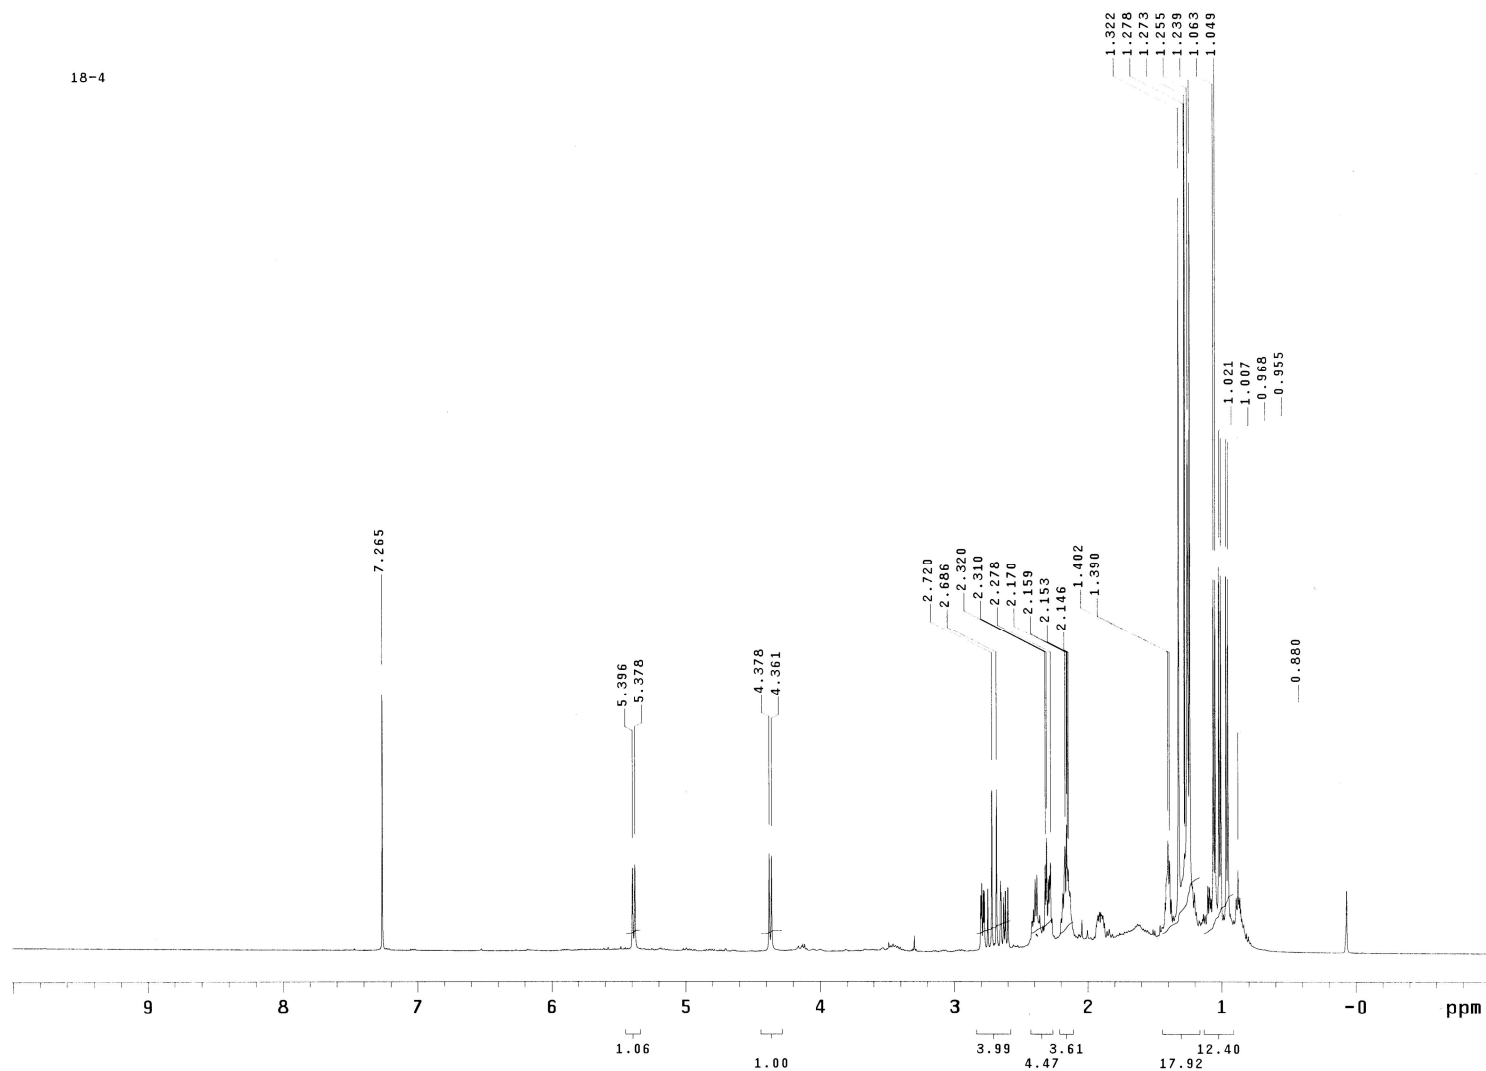

**S2.** <sup>1</sup>H NMR spectrum of **1** in CDCl<sub>3</sub> at 500 MHz.

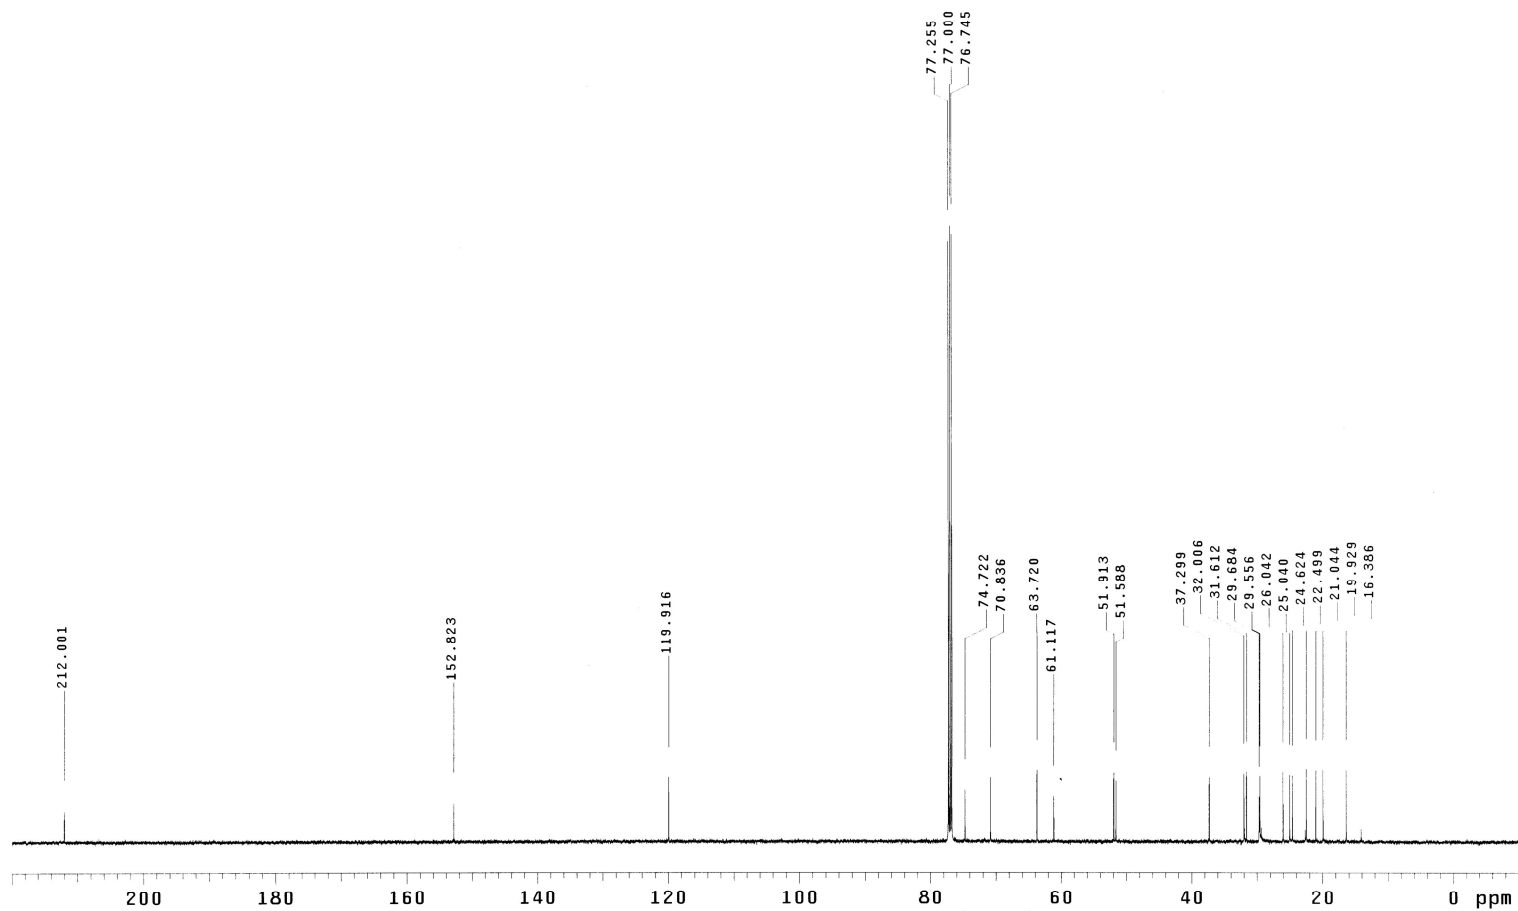

**S3.** <sup>13</sup>C NMR spectrum of **1** in CDCl<sub>3</sub> at 125 MHz.

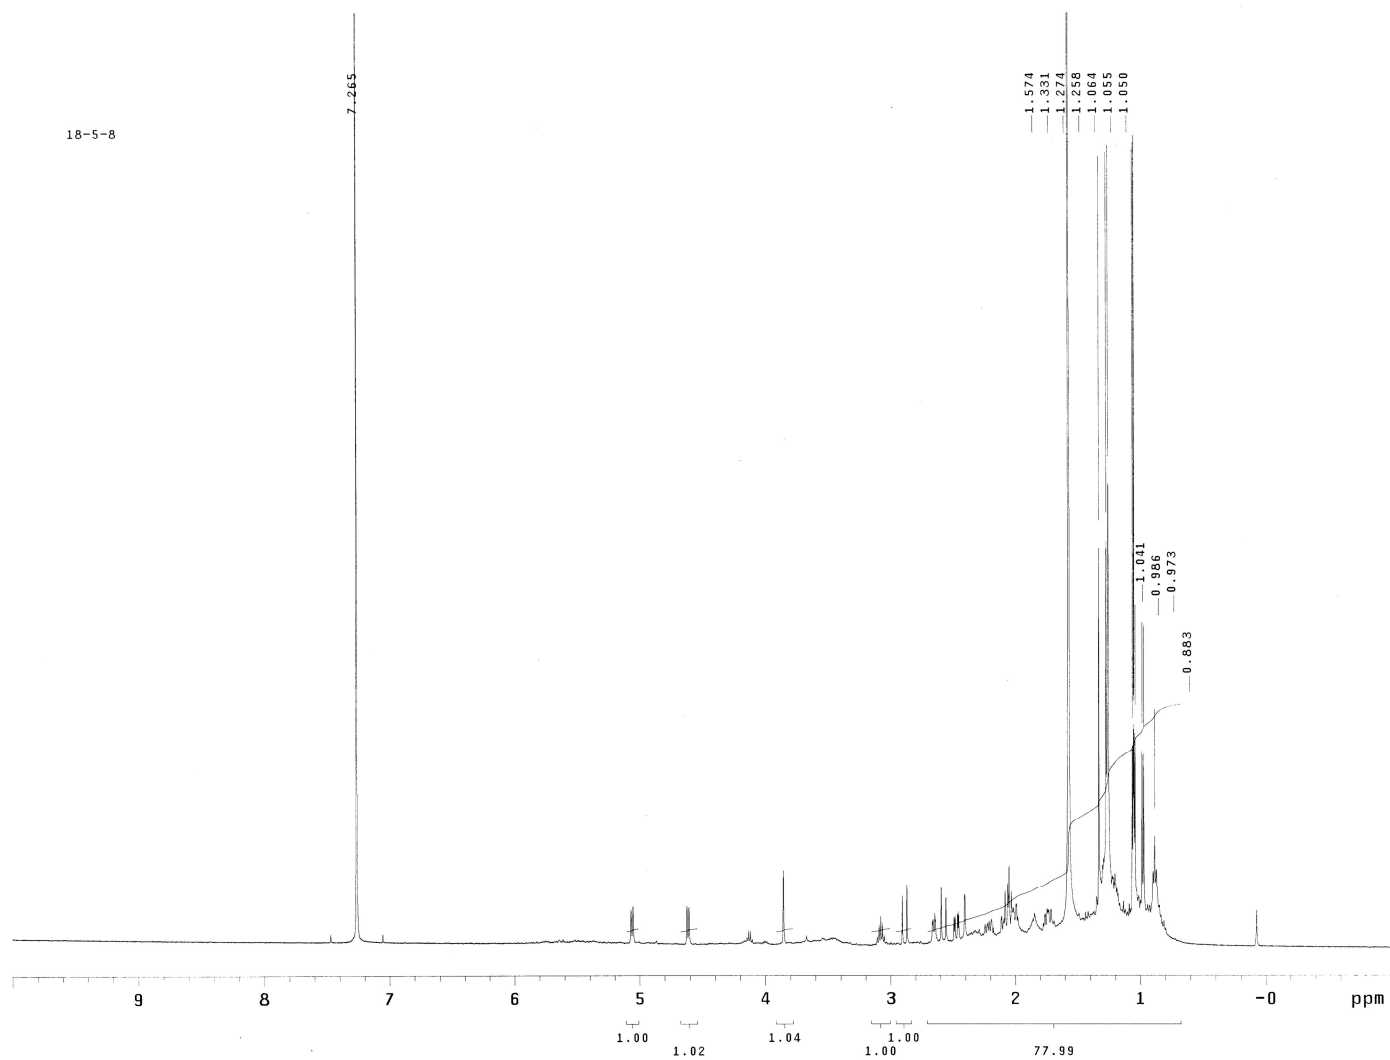

**S4.**  $^1\text{H}$  NMR spectrum of **2** in  $\text{CDCl}_3$  at 500 MHz.

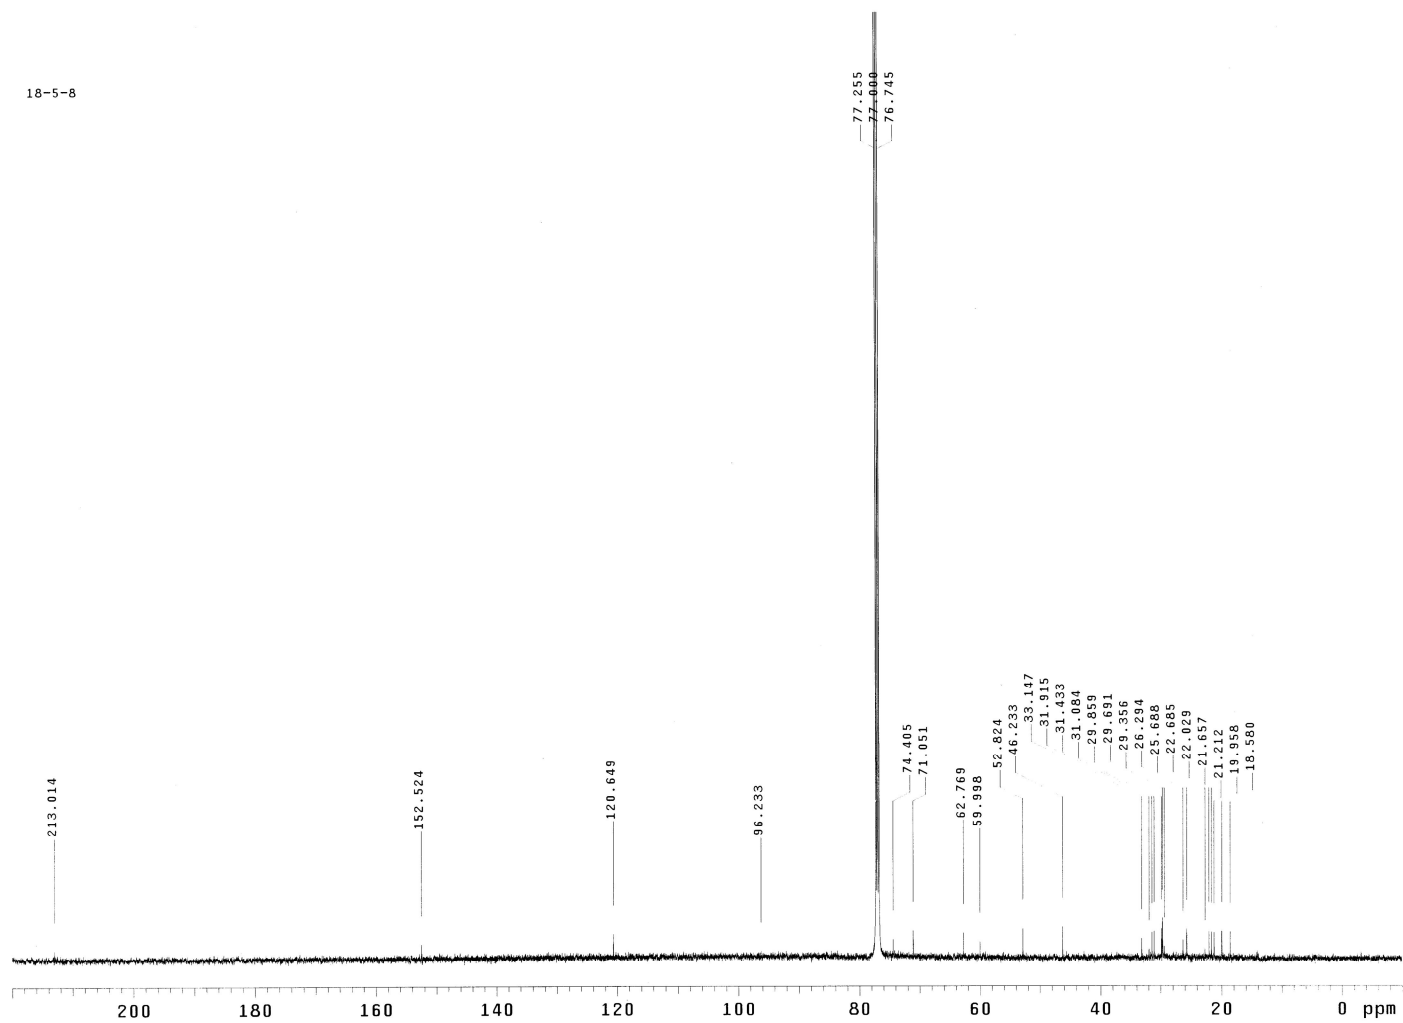

**S5.**  $^{13}\text{C}$  NMR spectrum of **2** in  $\text{CDCl}_3$  at 125 MHz.
